# Supplementary material for: Small non-coding RNAs in Streptomyces coelicolor
Source: PubMed Central journal article supplement — Nucleic Acids Res. 2008 Nov 12;36(22):7240–51. doi: 10.1093/nar/gkn898 (PMC2602773; doi:10.1093/nar/gkn898), 2008-11-12
Supplement: gkn898_1.pdf [file gkn898_1.pdf]

**Table S2. Oligonucleotide sequences and use**

| Oligo name | Sequence (5'-3')               | Function                        |
|------------|--------------------------------|---------------------------------|
| 1906-1     | CAGGTCGGCGGAACCGACAAGGTGCTC    | Northern blot analysis; 5' RACE |
| 1906-2     | GAGCACCTTGTCCGGTTCGCCGACCTG    | Northern blot analysis; 3' RACE |
| 1906-3     | GTTGTGCCGGTGACGGGACTCGAACCCGTG | Northern blot analysis          |
| 1906-4     | GCAACCGTCCGATCAAAGGAAGTATCC    | Northern blot analysis          |
| 1906-5     | GAGTTCAGGTCGGCGGAACC           | 5' RACE                         |
| 1906-6     | CCGACAAGGTGCTCTAACCCC          | 5' RACE                         |
| 1906-7     | GTAGCTCAGGGGTTAGAGCACC         | 3' RACE                         |
| 2094-1     | CCACAGGCGAGTGACACGAATCGG       | Northern blot analysis          |
| 2094-2     | CCGATTCTGTCTACTCGCTGTGG        | Northern blot analysis          |
| 2101-1     | CGGCCGGCGGAAGGAGCGGAT          | Northern blot analysis          |
| 2101-2     | ATCGCGGGCCCGGCTCCGTT           | Northern blot analysis          |
| 2101-3     | GTCGTCCCTCCGGGCTCCCCCGTGT      | Northern blot analysis          |
| 2101-4     | GAACGGCGGTGCACGAAGAACGCCG      | Northern blot analysis          |
| 2101-5     | CTCGCTCCCGCCGGCCCGG            | Northern blot analysis; 5' RACE |
| 2101-6     | CCCCGTGTCTCGCTCCCGCCGG         | 5' RACE                         |
| 2101-7     | CGGGGCCGGCGGGAGCGAG            | 3' RACE                         |
| 2101-8     | CCGCCGGCCGGGGCCGGCGGGA         | 3' RACE                         |
| 2736-1     | CGCAGATCACAGTGATGCGAACG        | Northern blot analysis          |
| 2736-2     | CGTTCGCATCACTGTGATCTGCG        | Northern blot analysis          |
| 3000-1     | GCTGATCACGCCACAAGCTATCGC       | Northern blot analysis          |
| 3000-2     | GCGATAGCCTTGTGGCGTGATCAGC      | Northern blot analysis          |
| 3043-1     | CACGGCCTTGCGCGTCCACGGTTGT      | 5' RACE                         |
| 3043-2     | CCGTGGGCGGGCGGAGGACATCGAC      | 3' RACE                         |
| 3045-1     | CCGTGGACGCGCAAGGACGTGGGCGGGC   | Northern blot analysis; 3' RACE |
| 3045-2     | GCCCCCCACGTCTTGCGCGTCCACGG     | Northern blot analysis; 5' RACE |
| 3045-3     | CACGTCTTGCGCGTCCACGGTCTC       | 5' RACE                         |
| 3045-4     | GCAAGGACGTGGGCGGGCAGACGACG     | 3' RACE                         |
| 3124-1     | GTGTGGCGCTCCGTTATCGACGCGCTCTT  | Northern blot analysis; 5' RACE |
| 3124-2     | AAGAGCGCGTCGATAACGGAGCGCCACAC  | Northern blot analysis          |
| 3124-3     | GGGTACGGCCTTCTCTCCGAGTAG       | 5' RACE                         |
| 3124-4     | CCTCTCCGAGTAGACTGCTGAAG        | 5' RACE                         |
| 3261-1     | CGTTCGTACAGTGGCGCGCTCCACC      | Northern blot analysis          |
| 3261-2     | CGCGAACCGACCGAACCTTCGTCTA      | Northern blot analysis          |
| 3261-3     | TGCCCCGAGTCGGCAACGGCGCCCCCTTC  | Northern blot analysis          |
| 3261-4     | GCCCCCTCCGCCCGGTGCCGGCCGATCC   | Northern blot analysis          |
| 3261-5     | GATCCCCCGCCGGAGGCATCTCTTGTGC   | Northern blot analysis          |
| 3261-6     | CACGCACGCCCCAACGTGCC           | Northern blot analysis; 5' RACE |
| 3261-7     | GGCGTCCAGGTCGTTCTGTACAGTG      | Northern blot analysis; 5' RACE |
| 3261-8     | CACCCACGCACGCCCCAACG           | Northern blot analysis; 5' RACE |
| 3261-9     | CTCCACCTGGACGCCCTGAACCACGC     | 5' RACE                         |
| 3261-10    | GTGGCGCGCTCCACCTGGACGCCCTGAAC  | 5' RACE                         |
| 3261-11    | CACCGCGGAGGTGGACCTGCGGGACTTG   | 3' RACE                         |
| 3261-12    | GTTCAGGGCGTCCAGGTGGAGCGCGCCAC  | 3' RACE                         |
| 3287 comp  | CGTCTTCGTCTCATCGTCCGGCCCCCTCC  | Northern blot analysis          |
| 3287-1     | TCGTCTTCGTCCGCATCGTC           | 5' RACE                         |
| 3287-2     | TCATCGTCCGGCCCCCTC             | 5' RACE                         |
| 3287-3     | GGAGGGGGCCGGACGATG             | 3' RACE                         |
| 3287-4     | GGACGATGACGACGAAGACG           | 3' RACE                         |
| 3558-1     | CGATCCGTGACTTCCATGGT           | Northern blot analysis          |

|        |                              |                                 |
|--------|------------------------------|---------------------------------|
| 3558-2 | CCCGAGAGCCCTCTCAGGCAAACC     | Northern blot analysis          |
| 3558-3 | GGGGAGAGCGGGGTCGTCTCCAC      | Northern blot analysis; 5' RACE |
| 3558-4 | GGGGGAGAGCGGGGTCGTCT         | 5' RACE                         |
| 3558-5 | GGAGGAGTCGACCGGGTTAGCACG     | Northern blot analysis; 5' RACE |
| 3558-6 | GGCCGTGGAGACGACCCCCGCTC      | 3' RACE                         |
| 3558-7 | CGGGGCCAGATCGTGAGAAGTGC      | Northern blot analysis          |
| 3558-8 | CCCACCCGGACATGCTGACGACCCCCG  | Northern blot analysis          |
| 3870-1 | CGACGGGGGATGCGCCAGCGGT       | 5' RACE                         |
| 3870-2 | ACCGCTGGCGCATCCCCCGTCG       | 3' RACE                         |
| 3870-3 | CAGCCCGACCGCTGGCGCATCC       | 3' RACE                         |
| 3871-1 | GGCTAACAGGATGTGAACCTGTGGC    | Northern blot analysis;         |
| 3871-2 | GCCACAGTTTACATCCTGTAGCC      | Northern blot analysis;         |
| 3871-3 | GCTGGTGGGGCTAACAGGATG        | 5' RACE                         |
| 3871-4 | GGGGCTAACAGGATGTGAACCTG      | 5' RACE                         |
| 3871-5 | GGATGAGGCCACAGGTTAC          | 3' RACE                         |
| 3974-1 | TGCTGGCGACGGGGATGCACCAGC     | Northern blot analysis; 5' RACE |
| 3974-2 | GCTGGTGCATCCCCCGTCGCCAGCA    | Northern blot analysis; 3' RACE |
| 3974-3 | GGAAAAGACCCGGTTGCTGG         | 5' RACE                         |
| 3974-4 | CGACGGGGGATGCACCAGCAAC       | 5' RACE                         |
| 3974-5 | CGAGTAGCCCGGTTGCTGGTGC       | 3' RACE                         |
| 3974-6 | GTTGCTGGTGCATCCCCCGTCG       | 3' RACE                         |
| 4069-1 | GCGCAAGCGTTCCGGCACTTGGCCC    | Northern blot analysis          |
| 4069-2 | GGGCCAAGTGCCGGAACGCTTGC      | Northern blot analysis          |
| 4389-1 | CGCTAGCCCGCAGCCACCTCACGC     | Northern blot analysis          |
| 4389-2 | GCGTGAGGTGGCTGCGGGCTAGCG     | Northern blot analysis          |
| 4677-1 | CCCCGCTGGGACTGGCATCC         | Northern blot analysis; 5' RACE |
| 4677-2 | AAGGCATCGGCCCCCGCTGGGA       | 5' RACE                         |
| 4677-3 | GGATGCCAGTCCCAGCGGGG         | 3' RACE                         |
| 4677-4 | TCGCACCGGGATGCCAGTCCCA       | 3' RACE                         |
| 4701-1 | GCTCGGTGCGAGTGCCGATGCTGC     | Northern blot analysis          |
| 4701-2 | GCAGCATCGGCACTCGACCGAGC      | Northern blot analysis          |
| 4784-1 | CGATCCGTACGCCTCATCGCTCC      | Northern blot analysis          |
| 4784-2 | GGAGCGATGAGGCGTACGGATCG      | Northern blot analysis          |
| 4797-1 | GCACCGTAGCCAACCTCGTGTGGCC    | Northern blot analysis          |
| 4797-2 | GGCCACACGAGTTGGCTACGGTGC     | Northern blot analysis          |
| 4868-1 | CGCAGTAATGAGTGAGCCGACTGG     | Northern blot analysis          |
| 4868-2 | CCAGTCGGCTCACTCATTACTGCG     | Northern blot analysis          |
| 4908-1 | CGACGGGGGGCGCGAGATGAACACG    | Northern blot analysis          |
| 4908-2 | CGTGTTCATCTCGCGCCCCCGTCG     | Northern blot analysis          |
| 5028-1 | CGAACCACGGGTGTCGGATCTCAGC    | Northern blot analysis          |
| 5028-2 | GCTGAGATCCGACACCCGTGGTTCCG   | Northern blot analysis          |
| 5334-1 | TGGAGCGCGCCACTGTACGAACGACC   | Northern blot analysis; 5' RACE |
| 5334-2 | GGTCCGTAGTGGCATGCGCGGGG      | Northern blot analysis          |
| 5334-3 | CTAGGGAGAGTGGTGG             | Northern blot analysis; 5' RACE |
| 5334-4 | AGAGTGGTGGGTTGAGG            | 5' RACE                         |
| 5541-1 | CGAAACGTTATGAACAGCGGAGCC     | Northern blot analysis          |
| 5541-2 | GGCTCCGCTGTTTCATAACGTTTCG    | Northern blot analysis          |
| 5676-1 | TGTGTGCGCGAGGCACGACAGGTCTGA  | Northern blot analysis; 5' RACE |
| 5676-2 | TCGACCTGGTTCGTGCCTCGCGCACACA | Northern blot analysis; 3' RACE |
| 5676-3 | GGTCGAAGCCGGGGAAGCC          | 5' RACE                         |
| 5676-4 | CGTGCCCTCGCGCACACAACCGGAG    | 3' RACE                         |

M13 forward GTAAAACGACGGCCAG  
M13 reverse CAGGAAACAGCTATGAC  
5S CCCTGCAGTACCATCGGCGCT

Sequencing of cDNA clones  
Sequencing of cDNA clones  
RNA integrity in northern blots

5' RACE Adapter GCUGAUGGCGAUGAAUGAACACUGCGUUUGCUGGCUUUGAUGAAA  
3' RACE Adapter GCGAGCACAGAATTAATACGACTCACTATAGGT12VN

RNA adapter  
RNA adapter

5' RACE Adapter-1 GCTGATGGCGATGAATGAACACTG  
5' RACE Adapter-2 CGCGGATCCGAACACTGCGTTTGCTGGCTTTGATG  
3' RACE Adapter-1 GCGAGCACAGAATTAATACGACT  
3' RACE Adapter-2 CGCGGATCCGAATTAATACGACTCACTATAGG

5' RACE - amplification of cDNA clones  
5' RACE - amplification of cDNA clones  
3' RACE - amplification of cDNA clones  
3' RACE - amplification of cDNA clones
