# Supplementary material for: Small non-coding RNAs in Streptomyces coelicolor
Source: PubMed Central journal article supplement — Nucleic Acids Res. 2008 Nov 12;36(22):7240–51. doi: 10.1093/nar/gkn898 (PMC2602773; doi:10.1093/nar/gkn898), 2008-11-12
Supplement: gkn898_2.pdf [file gkn898_2.pdf]

**Table S4. Cloned cDNA sequences**

| Cloned cDNA sequence                      | Product/Comments*                            |
|-------------------------------------------|----------------------------------------------|
| GGGGTTGCGTGTGCGGGGTTGTGGGATCTCT           | 23S rRNA fragment                            |
| GGGGTTGCGTGTGCGGGGTTGTGGGATCTCT           | 23S rRNA fragment                            |
| GAGCCTGCGAGTTTGCGGTGTGTTGCGAGGTTAACC      | 23S rRNA fragment                            |
| GCATGGCTGGTTGGCTACGTTCCGGGAGGG            | 23S rRNA fragment                            |
| AGCGGGAAGCCTGCTTCGAGATGAGGACTCCCACC       | 23S rRNA fragment                            |
| CGGGACGGACGTAACCTGTGGTGTGCCAGTTGTCTCTG    | 23S rRNA fragment                            |
| CGGGACGGACG~AACCTGTGGTGTGCCAGTTGTCTCT     | 23S rRNA fragment                            |
| CCGTGAGGTGTGGAGGTGACCCGCTACTAATAGGCCGA    | 23S rRNA fragment                            |
| CCGTGAGGTGTGGAGGTGACCCGCTACTAATAGGCCGA    | 23S rRNA fragment                            |
| CCGTGAGGTGTGGAGGTGACCCGCTACTAATAGGCCGAGGG | 23S rRNA fragment                            |
| TGTCCGTGCCGAGCTAACGCATTAAGTGCCCCGCC       | 16S rRNA fragment                            |
| GTCCGTGCCGAGCTAACGCATTAAGTGCCCCGCC        | 16S rRNA fragment                            |
| TGTGGGAGGGAGCTGTGCAAGGTGGGACTGGCGATTGG    | 16S rRNA fragment                            |
| GGGAGGGAGCTGTGCAAGGTGGGACTGGCGATTGG       | 16S rRNA fragment                            |
| GGGAGGGAGCTGTGCAAGGTGGGACTGGCGATTGG       | 16S rRNA fragment                            |
| GTGGGAGGGAGCTGTGCAAGGTGGGACTGGCGA         | 16S rRNA fragment                            |
| CCTCGGGGTGTTGGGGACTCACGGGAGACCGCCGGG      | 16S rRNA fragment                            |
| CGGGGTGTTGGGGACTCACGGGAGACCGCCGGG         | 16S rRNA fragment                            |
| CCTTCGGGGTGTGGGGACTCACGGGAGACCGCCG        | 16S rRNA fragment                            |
| CGGGGTGTTGGGGACTCACGGGAGACCGCCGGG         | 16S rRNA fragment                            |
| CGGGGTGTCGGGGACTCACGGGAGACCGCCG           | 16S rRNA fragment                            |
| GGGACCCGTGGGAGAGTAGGACGCCGCCGAACA         | 5S rRNA fragment                             |
| GGGACCCGTGAGAGAGTAGGACGCCGCCG             | 5S rRNA fragment                             |
| CGGCTCTGGCGGGTGCCTGGGGGGCGT               | 4.5S RNA fragment                            |
| CGGCTCTGGCGGGTGCCTGGGGGGCGT               | 4.5S RNA fragment                            |
| CGGCTCTGGCGGGTGCCTGGGTGGGCGT              | 4.5S RNA fragment                            |
| CGGCTCTGGCGGGTGCCTGGGGGGCGT               | 4.5S RNA fragment                            |
| CGCGCGAGGTGGCCGGCCGGGTGGGCGACA            | within SCO0388                               |
| GGTTCCGGTGGTTCGGAGGCGGGCGCCCAGG           | within SCO0401                               |
| CCGGGGCCTCGGTCTGCACGGCGGGTGTATCCT         | within SCO0513                               |
| GGTGGTGAGCGTGTGGTCTACGACGGCGGTGG          | within SCO0764                               |
| CGTCGCCTGCCCTGCGCCTCGGTGT                 | within SCO0860                               |
| CCCCGAGGTCAGACACCCGCCGCTGCA               | IG region between SCO1550 and SCO1551        |
| CGGCAACATGATCATGGTCTCGGTCCG               | within <i>infC</i> (SCO1600)                 |
| CGGCAACATGATCATGGTCTCGGTCCG               | within <i>infC</i> (SCO1600)                 |
| CGGGGCCGGCGGGAGCGAG                       | <b>IG region between SCO2100 and SCO2101</b> |
| CGGGCTGCGGCGAACAGGTGTCACGGACGGA           | within SCO2322                               |
| CGGAGGGGGCCGGGCGATGACGAAGAAGAC            | <b>antisense to SCO3287</b>                  |
| CTACCCCCCGAGTGCCTGACGCGATTCCCC            | within SCO3662                               |
| CCCCGCCCTGGACGCCTCAAGTGCTCGACCTG          | within SCO3712                               |
| CCACCTACGAGCCCGGCACCGTGCTCTACGACACC       | within SCO4175                               |
| GCACCGGGATGCCAGTCCCAGCGGGGGCCGATGC        | <b>IG region between SCO4676 and SCO4677</b> |
| GCACCAGGATGCCAGTCCCAGCGGGGGCCGATGC        | <b>IG region between SCO4676 and SCO4677</b> |
| GCACCGGGATGCCAGTCCCAGCGGGGGCCAATGC        | <b>IG region between SCO4676 and SCO4677</b> |
| CTCCAGGTGATCACGGACAAGAGCATCGTGCA          | within <i>rplQ</i> (SCO4730)                 |
| CGGGGCGGGTTCGCGGTGATGACGGTGA              | antisense to SCO4792                         |
| ATCCGGCTGCTGGCCGCCGACCGGGAAACGGGCTCCG     | within SCO5144                               |
| GCGGGGTGCGGCCGGCGATCTGCGGGCGGGAGATG       | within SCO5264                               |
| CGATCTGCCTGCGCCTGCTACCGGGACCCCG           | within <i>recX</i> (SCO5770)                 |
| CCCAGGGCCGACCTGAGCCGGTGCACGCGATGAGCGAC    | within <i>lexA</i> (SCO5803)                 |

CCATCAGGTGGGACGACGAGCGGGGGA  
GC-CGAGGTGT---TCGACCAGGAGGGGTTCG  
CGCGTGCGTGCGGTGTGTGAGCGGA  
CCCACCAGGAGCCGTGAGAAAAGCACACCCTTGCC

within SCO5953  
within SCO6286  
IG region between SCO6624 and SCO6625  
between *ramC* (SCO6681) and *ramS* (SCO6682)

\* Bold sequences are those that were verified by northern blot analysis
